# Supplementary material for: Luminescence properties in relation to controllable morphologies of Ba3[Ge2B7O16(OH)2](OH)(H2O):Eu3+ and its thermal conversion product Ba3Ge2B6O16:Eu3+
Source: Royal Society of Chemistry journal article supplement (doi:10.1039/c8ra08636b), 2019-01-01
Supplement: c8ra08636b1.pdf [file c8ra08636b1.pdf]

Luminescence properties in relation to controllable morphologies of  
 $\text{Ba}_3[\text{Ge}_2\text{B}_7\text{O}_{16}(\text{OH})_2](\text{OH})(\text{H}_2\text{O})\text{:Eu}^{3+}$  and its thermal conversion product  
 $\text{Ba}_3\text{Ge}_2\text{B}_6\text{O}_{16}\text{:Eu}^{3+}$

Pan Liang\*

Department of Chemistry & Chemical Engineering, Shaanxi Xueqian Normal University, Xi'an 710100, P. R.

China, E-mail address: B14159@snnu.edu.cn

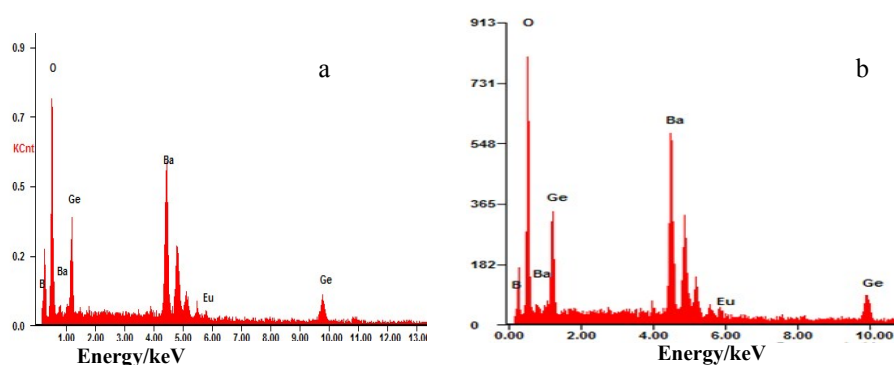

Fig. S1 The EDS patterns of samples  $\text{Ba}_3[\text{Ge}_2\text{B}_7\text{O}_{16}(\text{OH})_2](\text{OH})(\text{H}_2\text{O})\text{:Eu}^{3+}$ (a) and  $\text{Ba}_3\text{Ge}_2\text{B}_6\text{O}_{16}\text{:Eu}^{3+}$ (b)

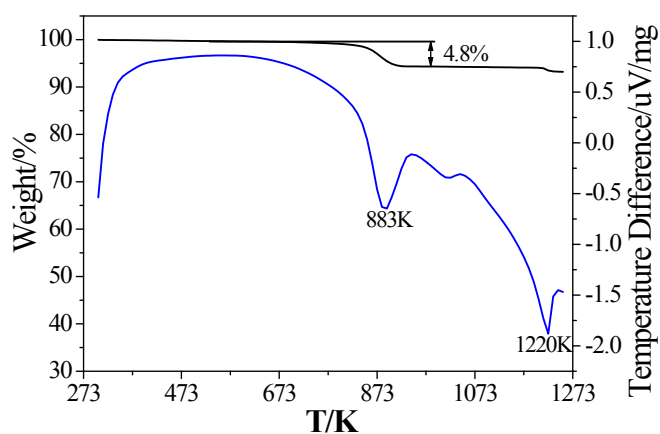

Fig. S2 Simultaneous TG-DTA curves of sample  $\text{Ba}_3[\text{Ge}_2\text{B}_7\text{O}_{16}(\text{OH})_2](\text{OH})(\text{H}_2\text{O})\text{:Eu}^{3+}$

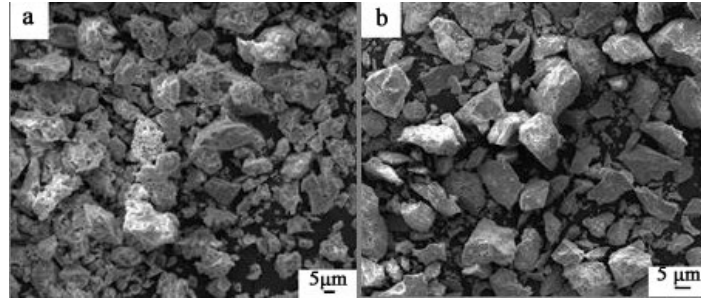

**Fig. S3** The SEM images of  $\text{Ba}_3\text{Ge}_2\text{B}_6\text{O}_{16}:\text{Eu}^{3+}$  prepared by different reaction method:(a) Precursor method; (b) Solid-state method
